# Supplementary material for: C8H6IN3O4: a birefringent crystal induced by uniformly aligned hybrid groups
Source: Royal Society of Chemistry journal article supplement (doi:10.1039/d3tc04666d), 2024-01-01
Supplement: d3tc04666d1.pdf [file d3tc04666d1.pdf]

# Electronic Supplementary Information

## **C<sub>8</sub>H<sub>6</sub>IN<sub>3</sub>O<sub>4</sub>: A birefringent crystal induced by the uniformly aligned hybrid groups†**

Zixiang Chen,<sup>a</sup> Qiong Wu,<sup>\*a</sup> Jinquan Hong,<sup>\*a</sup> Guofa Dong,<sup>b</sup> and Liang Ma<sup>b</sup>

*a. College of Physics and Electronic Information Engineering, Minjiang University, Fuzhou, Fujian 350108, China*

*b. Department of Materials, College of Materials and Chemical Engineering, Minjiang University, Fuzhou, Fujian 350108, China*

\*Email: [wwwu@mju.edu.cn](mailto:wwwu@mju.edu.cn) (Q.Wu)

\*Email: [jqhong@mju.edu.cn](mailto:jqhong@mju.edu.cn) (J.Hong)

### Contents

|                                                                                                                        |     |
|------------------------------------------------------------------------------------------------------------------------|-----|
| Reagents.....                                                                                                          | S2  |
| Synthesis of C <sub>8</sub> H <sub>6</sub> IN <sub>3</sub> O <sub>4</sub> ( <b>1</b> ).....                            | S2  |
| Single-Crystal Structure Determination.....                                                                            | S2  |
| Thermal Stability Analysis.....                                                                                        | S2  |
| UV/Vis/NIR Diffuse Reflectance Spectroscopy.....                                                                       | S2  |
| Infrared Spectroscopy.....                                                                                             | S2  |
| Computational Methods.....                                                                                             | S3  |
| Birefringence Measurements.....                                                                                        | S3  |
| Figure S1. Single crystals photo of <b>1</b> .....                                                                     | S4  |
| Figure S2. Infrared spectrum of <b>1</b> .....                                                                         | S4  |
| Figure S3. The measured thickness of crystal <b>1</b> .....                                                            | S5  |
| Figure S4. The Original and completely extinct crystal of <b>1</b> .....                                               | S5  |
| Table S1. Crystal data and structure refinement for C <sub>8</sub> H <sub>6</sub> IN <sub>3</sub> O <sub>4</sub> ..... | S6  |
| Table S2. Atomic Coordinates and Equivalent Isotropic Displacement Parameters.....                                     | S7  |
| Table S3. Anisotropic Displacement Parameters.....                                                                     | S7  |
| Table S4. Bond Lengths for C <sub>8</sub> H <sub>6</sub> IN <sub>3</sub> O <sub>4</sub> .....                          | S8  |
| Table S5. Bond Angles for C <sub>8</sub> H <sub>6</sub> IN <sub>3</sub> O <sub>4</sub> .....                           | S8  |
| Table S6. Torsion Angles for C <sub>8</sub> H <sub>6</sub> IN <sub>3</sub> O <sub>4</sub> .....                        | S9  |
| Table S7 Hydrogen Atom Coordinates and Isotropic Displacement Parameters.....                                          | S9  |
| Table S8. Static polarizability of different units.....                                                                | S9  |
| References.....                                                                                                        | S10 |

## Reagents

$C_8H_5IN_2O$  (97%) and  $HNO_3$  (65%) were purchased from Aladdin and used as received.

## Synthesis of $C_8H_6IN_3O_4$ (**1**)

Crystals of **1** were synthesized by a simple evaporation technique of aqueous solution. The raw reactants of  $C_8H_5IN_2O$  (0.223 g, 1 mmol) and  $HNO_3$  (0.630g, 10 mmol) were mixed together in a glass beaker. The solution was stirred with a magnetic mixer for 30 minutes, and then filtered through a filter paper to obtain a clear, transparent liquid. The solution was then left to stand at room temperature for crystal growth. After several days of growth, colourless block crystals of **1** were obtained, with dimensions reaching  $2 \times 1 \times 1$  mm<sup>3</sup> (Figure S1). The purity of the obtained product is confirmed by the powder X-ray diffraction (XRD) patterns, which were taken on a Rigaku MiniFlex II diffractometer (Cu  $K\alpha$  radiation) in the range of  $2\theta = 7^\circ$ – $60^\circ$  with a step width of  $0.01^\circ$  and a sampling rate of  $1^\circ \text{ min}^{-1}$ . The results agree well with the calculated XRD patterns from single-crystal XRD analyses (Figure 1a).

## Single-Crystal Structure Determination

Colorless block crystals of **1** was selected using an optical microscope for single-crystal XRD analysis. The diffraction data were collected by using graphite-monochromatized Mo  $K\alpha$  radiation ( $\lambda = 0.71073 \text{ \AA}$ ) at 293(2) K on the XtaLAB Pro II AFC12 instrument equipped with a Hybrid Pixel Array Detector and Rigaku Mo X-ray Source. The collection of the intensity data, cell refinement, and data reduction were carried out with the program CrysAlisPro.<sup>1</sup> Using Olex2,<sup>2</sup> the structure was solved with the olex2.solve<sup>3</sup> structure solution program using Charge Flipping and refined with the SHELXL<sup>4</sup> refinement package using Least Squares minimisation. Details of crystal parameters, data collection, and structure refinement are summarized in Table S1. The atomic coordinates and equivalent isotropic displacement parameters are listed in Table S2, and the anisotropic displacement parameters are listed in Table S3. The selected bond distances and angles are presented in Table S4–S5. The torsion angles and hydrogen atom coordinates and isotropic displacement parameters are shown in Tables S6 and S7, respectively.

## Thermal Stability Analysis

The thermogravimetric (TG) and differential thermal analysis (DTA) of **1** was carried out on a NETZSCH STA 449F3 simultaneous analyzer. About 6.372 mg of **1** was placed in  $Al_2O_3$  crucibles, heated at a rate of  $15 \text{ }^\circ\text{C min}^{-1}$  from room temperature to  $900 \text{ }^\circ\text{C}$  under flowing nitrogen.

## UV-Vis-NIR Diffuse Reflectance Spectroscopy

The UV-Vis-NIR diffuse reflection data were collected on a PerkinElmer Lamda-1050 UV/vis/NIR spectrophotometer. A whiteboard provided by the merchant was used as a reference (100% reflectance) in the range from 220 nm to 800 nm.

## Infrared Spectroscopy

Infrared spectrum was measured on a Nicolet iS50FT-IR spectrometer with KBr pellets as a standard in the range of  $4000$ – $400 \text{ cm}^{-1}$ . The mixture of **1** and dried KBr (mass ratio = 1:100) was ground thoroughly in an agate mortar, and then pressed into a thin slice for measurement.

## Computational Methods

The first-principles calculations for **1** were performed by CASTEP<sup>5</sup> on a plane-wave pseudopotential total energy package based density functional theory (DFT).<sup>6</sup> The functional developed by Perdew-Burke-Ernzerhof (PBE) functional within the generalized gradient approximation (GGA)<sup>7-8</sup> form was adopted to describe the exchange-correlation energy. The ultrasoft pseudopotentials were used to model the effective interaction between atom cores and valence electrons. H 1s<sup>1</sup>, C 2s<sup>2</sup>2p<sup>2</sup>, N 2s<sup>2</sup>2p<sup>3</sup>, O 2s<sup>2</sup>2p<sup>4</sup> and I 5s<sup>2</sup>5p<sup>5</sup> electrons were treated as valence electrons. The kinetic energy cutoff of 630 eV and dense 1 × 2 × 1 Monkhorst-Pack<sup>9</sup> k-point meshes in the Brillouin zones were chosen. The linear optical properties were examined based on the dielectric function  $\epsilon(\omega) = \epsilon_1(\omega) + i\epsilon_2(\omega)$ . The imaginary part of dielectric function  $\epsilon_2$  can be calculated based on the electronic structures and the real part is obtained by the Kramers-Kronig transformation, accordingly the refractive indices and the birefringence ( $\Delta n$ ) can be calculated. The frequency-dependent refractive indices were calculated to demonstrate the validity of birefringence measurements.

To explore the polarizability anisotropy and electronic structure of [C<sub>8</sub>H<sub>6</sub>IN<sub>2</sub>O]<sup>+</sup> and [NO<sub>3</sub>]<sup>-</sup> systematic calculations were implemented via the Gaussian 09 package<sup>10</sup> with the hybrid B3LYP functional at 3-21G level. After that, the calculation results were analyzed by the Multiwfn 3.8 code.<sup>11</sup> The polarizability anisotropy was defined by the static polarizability, according to the following Eq (1). Detailed static polarizability has been shown in the Table S8. It is clear that the polarizability is highly anisotropic.

$$\delta = \sqrt{[(\alpha_{xx} - \alpha_{yy})^2 + (\alpha_{xx} - \alpha_{zz})^2 + (\alpha_{yy} - \alpha_{zz})^2 + 6(\alpha_{xy}^2 + \alpha_{xz}^2 + \alpha_{yz}^2)]/2} \quad \text{Eq (1)}$$

where  $\alpha$  represents the static polarizability, and  $\delta$  is the polarizability anisotropy.

## Birefringence Measurements

The Birefringence of **1** was obtained through a polarizing microscope (Nikon LV1000) equipped with a Berek compensator at a wavelength of 550 nm. Small crystal was chose for the measurement. The following formula was listed to calculate birefringence:  $R = |N_e - N_o| = \Delta n \times T$ , where R denotes the optical path difference,  $\Delta n$  represents birefringence, and T denotes the thickness of the crystal.

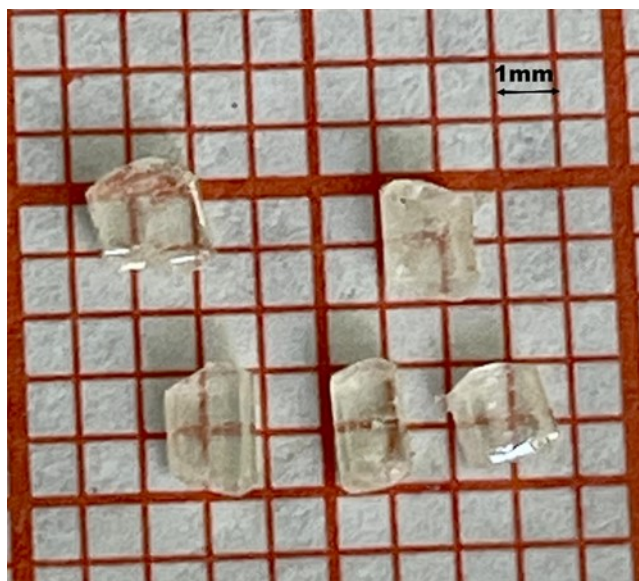

Figure S1. Single crystals photo of 1.

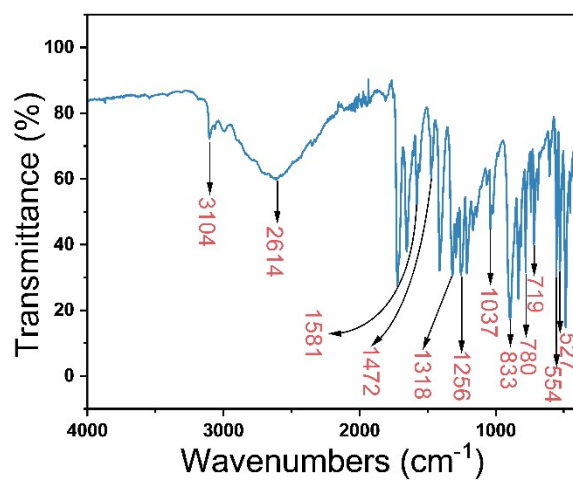

Figure S2. Infrared spectrum of 1.

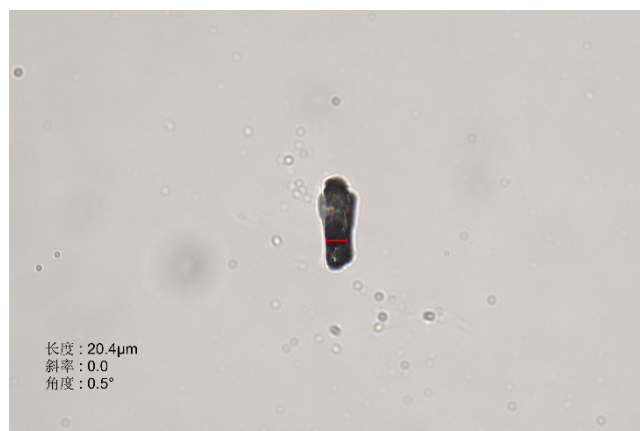

**Figure S3.** Crystal used for birefringence measurements with thickness of 20.4  $\mu\text{m}$ .

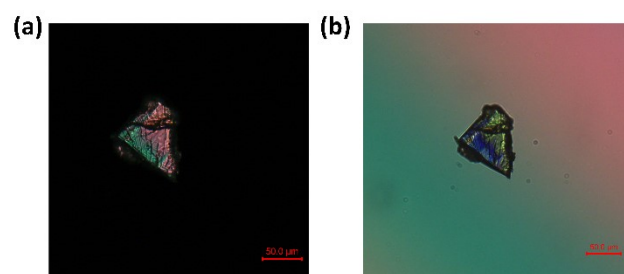

**Figure S4.** The Original (a) and completely extinct (b) crystal of 1.

Table S1. Crystal Data and Structural Refinement for C<sub>8</sub>H<sub>6</sub>IN<sub>3</sub>O<sub>4</sub>.

|                                        |                                                               |
|----------------------------------------|---------------------------------------------------------------|
| Empirical formula                      | C <sub>8</sub> H <sub>6</sub> IN <sub>3</sub> O <sub>4</sub>  |
| Formula weight                         | 335.06                                                        |
| Temperature/K                          | 293(2)                                                        |
| Crystal system                         | orthorhombic                                                  |
| Space group                            | <i>Pnma</i>                                                   |
| a/Å                                    | 11.3638(4)                                                    |
| b/Å                                    | 6.3747(3)                                                     |
| c/Å                                    | 15.1177(5)                                                    |
| $\alpha$ /°                            | 90                                                            |
| $\beta$ /°                             | 90                                                            |
| $\gamma$ /°                            | 90                                                            |
| Volume/Å <sup>3</sup>                  | 1095.14(7)                                                    |
| Z                                      | 4                                                             |
| $\rho_{\text{calc}}$ g/cm <sup>3</sup> | 2.032                                                         |
| $\mu$ /mm <sup>-1</sup>                | 2.927                                                         |
| F(000)                                 | 640.0                                                         |
| Crystal size/mm <sup>3</sup>           | 0.06 × 0.05 × 0.05                                            |
| Radiation                              | Mo K $\alpha$ ( $\lambda$ = 0.71073)                          |
| 2 $\theta$ range for data collection/° | 4.484 to 54.076                                               |
| Index ranges                           | -13 ≤ h ≤ 14, -8 ≤ k ≤ 7, -17 ≤ l ≤ 18                        |
| Reflections collected                  | 6145                                                          |
| Independent reflections                | 1260 [R <sub>int</sub> = 0.0428, R <sub>sigma</sub> = 0.0277] |
| Data/restraints/parameters             | 1260/0/98                                                     |
| Goodness-of-fit on F <sup>2</sup>      | 1.051                                                         |
| Final R indexes [I >= 2 $\sigma$ (I)]  | R <sub>1</sub> = 0.0294, wR <sub>2</sub> = 0.0707             |
| Final R indexes [all data]             | R <sub>1</sub> = 0.0470, wR <sub>2</sub> = 0.0800             |

**Table S2. The Fractional Atomic Coordinates ( $\times 10^4$ ) and Equivalent Isotropic Displacement Parameters ( $\text{\AA}^2 \times 10^3$ ) for  $\text{C}_8\text{H}_6\text{IN}_3\text{O}_4$ .  $U_{\text{eq}}$  is defined as 1/3 of the trace of the orthogonalised  $U_{\text{IJ}}$  tensor.**

| Atom | $x$       | $y$  | $z$        | $U(\text{eq})$ | BVS   |
|------|-----------|------|------------|----------------|-------|
| I1   | 5082.1(3) | 7500 | 7120.9(2)  | 76.2(2)        | 1.067 |
| O1   | 431(3)    | 7500 | 5827(2)    | 83.0(12)       |       |
| N2   | 2273(3)   | 7500 | 3580(2)    | 50.0(9)        | 2.826 |
| N3   | 529(3)    | 7500 | 4338(2)    | 55.9(9)        | 2.701 |
| C1   | 4172(4)   | 7500 | 5915(3)    | 53.5(10)       |       |
| C2   | 4764(4)   | 7500 | 5115(3)    | 52.7(11)       |       |
| C3   | 4149(3)   | 7500 | 4331(3)    | 50.8(10)       |       |
| C4   | 2933(3)   | 7500 | 4355(2)    | 44.3(9)        |       |
| C5   | 1131(4)   | 7500 | 3591(2)    | 54.8(11)       |       |
| C6   | 1052(4)   | 7500 | 5177(3)    | 56.3(11)       |       |
| C7   | 2331(3)   | 7500 | 5157(2)    | 46.3(9)        |       |
| C8   | 2971(4)   | 7500 | 5944(3)    | 55.1(11)       |       |
| O2   | 1947(3)   | 2500 | 5607.0(18) | 64.5(8)        |       |
| O3   | 3321(2)   | 2500 | 6589(2)    | 70.9(10)       |       |
| O4   | 1513(2)   | 2500 | 6992.8(18) | 75.5(11)       |       |
| N1   | 2275(3)   | 2500 | 6398(2)    | 52.0(9)        | 5.026 |

**Table S3. Anisotropic Displacement Parameters ( $\text{\AA}^2 \times 10^3$ ) for  $\text{C}_8\text{H}_6\text{IN}_3\text{O}_4$ . The Anisotropic displacement factor exponent takes the form:  $-2\pi^2[h^2a^{*2}U_{11}+2hka^*b^*U_{12}+\dots]$ .**

| Atom | $U_{11}$ | $U_{22}$ | $U_{33}$ | $U_{23}$ | $U_{13}$   | $U_{12}$ |
|------|----------|----------|----------|----------|------------|----------|
| I1   | 87.8(3)  | 86.7(4)  | 54.1(3)  | 0        | -34.27(16) | 0        |
| O1   | 59.8(18) | 146(4)   | 42.7(18) | 0        | 11.7(16)   | 0        |
| N2   | 42.7(18) | 78(3)    | 29.0(17) | 0        | -1.9(14)   | 0        |
| N3   | 40.9(18) | 84(3)    | 43(2)    | 0        | 1.4(16)    | 0        |
| C1   | 63(3)    | 60(3)    | 37(2)    | 0        | -14.9(19)  | 0        |
| C2   | 45(2)    | 59(3)    | 55(3)    | 0        | -7.6(19)   | 0        |
| C3   | 46(2)    | 65(3)    | 42(2)    | 0        | 0.4(18)    | 0        |
| C4   | 45(2)    | 55(2)    | 33.7(19) | 0        | -4.3(16)   | 0        |
| C5   | 47(2)    | 84(3)    | 33(2)    | 0        | -4.3(17)   | 0        |
| C6   | 52(2)    | 80(3)    | 37(2)    | 0        | 5.5(18)    | 0        |
| C7   | 50(2)    | 57(3)    | 32(2)    | 0        | -2.4(17)   | 0        |
| C8   | 65(3)    | 67(3)    | 33(2)    | 0        | -1.5(18)   | 0        |
| O2   | 57.0(17) | 99(2)    | 37.4(16) | 0        | -4.1(13)   | 0        |
| O3   | 37.0(16) | 117(3)   | 58.7(19) | 0        | -1.6(14)   | 0        |
| O4   | 43.9(16) | 144(3)   | 38.8(16) | 0        | 6.3(13)    | 0        |
| N1   | 43(2)    | 71(3)    | 42(2)    | 0        | 1.7(15)    | 0        |

**Table S4. Bond Lengths for C<sub>8</sub>H<sub>6</sub>IN<sub>3</sub>O<sub>4</sub>.**

| Atom | Atom | Length/Å | Atom | Atom | Length/Å |
|------|------|----------|------|------|----------|
| I1   | C1   | 2.096(4) | C2   | C3   | 1.375(6) |
| O1   | C6   | 1.210(5) | C3   | C4   | 1.382(5) |
| N2   | C4   | 1.392(4) | C4   | C7   | 1.393(5) |
| N2   | C5   | 1.298(5) | C6   | C7   | 1.454(6) |
| N3   | C5   | 1.321(5) | C7   | C8   | 1.394(5) |
| N3   | C6   | 1.401(5) | O2   | N1   | 1.252(4) |
| C1   | C2   | 1.384(6) | O3   | N1   | 1.223(4) |
| C1   | C8   | 1.365(6) | O4   | N1   | 1.249(4) |

**Table S5. Bond Angles for C<sub>8</sub>H<sub>6</sub>IN<sub>3</sub>O<sub>4</sub>.**

| Atom | Atom | Atom | Angle/°  | Atom | Atom | Atom | Angle/°  |
|------|------|------|----------|------|------|------|----------|
| C5   | N2   | C4   | 121.9(3) | O1   | C6   | N3   | 119.2(4) |
| C5   | N3   | C6   | 123.7(3) | O1   | C6   | C7   | 126.9(4) |
| C2   | C1   | I1   | 121.4(3) | N3   | C6   | C7   | 113.9(3) |
| C8   | C1   | I1   | 117.7(3) | C4   | C7   | C6   | 120.6(3) |
| C8   | C1   | C2   | 120.9(4) | C4   | C7   | C8   | 119.1(4) |
| C3   | C2   | C1   | 120.4(4) | C8   | C7   | C6   | 120.3(3) |
| C2   | C3   | C4   | 119.1(4) | C1   | C8   | C7   | 119.6(4) |
| N2   | C4   | C7   | 118.0(4) | O3   | N1   | O2   | 121.0(3) |
| C3   | C4   | N2   | 121.1(3) | O3   | N1   | O4   | 120.2(3) |
| C3   | C4   | C7   | 120.9(3) | O4   | N1   | O2   | 118.8(3) |
| N2   | C5   | N3   | 121.9(4) |      |      |      |          |



**Table S6 Torsion Angles for C<sub>8</sub>H<sub>6</sub>IN<sub>3</sub>O<sub>4</sub>.**

| A  | B  | C  | D  | Angle/°    | A  | B  | C  | D  | Angle/°    |
|----|----|----|----|------------|----|----|----|----|------------|
| I1 | C1 | C2 | C3 | 180.000(1) | C3 | C4 | C7 | C6 | 180.000(1) |
| I1 | C1 | C8 | C7 | 180.000(1) | C3 | C4 | C7 | C8 | 0.000(1)   |
| O1 | C6 | C7 | C4 | 180.000(1) | C4 | N2 | C5 | N3 | 0.000(1)   |
| O1 | C6 | C7 | C8 | 0.000(1)   | C4 | C7 | C8 | C1 | 0.000(1)   |
| N2 | C4 | C7 | C6 | 0.000(1)   | C5 | N2 | C4 | C3 | 180.000(1) |
| N2 | C4 | C7 | C8 | 180.000(1) | C5 | N2 | C4 | C7 | 0.000(1)   |
| N3 | C6 | C7 | C4 | 0.000(1)   | C5 | N3 | C6 | O1 | 180.000(1) |
| N3 | C6 | C7 | C8 | 180.000(1) | C5 | N3 | C6 | C7 | 0.000(1)   |
| C1 | C2 | C3 | C4 | 0.000(1)   | C6 | N3 | C5 | N2 | 0.000(1)   |
| C2 | C1 | C8 | C7 | 0.000(1)   | C6 | C7 | C8 | C1 | 180.000(1) |
| C2 | C3 | C4 | N2 | 180.000(1) | C8 | C1 | C2 | C3 | 0.000(1)   |
| C2 | C3 | C4 | C7 | 0.000(1)   |    |    |    |    |            |

**Table S7. Hydrogen Atom Coordinates (Å×10<sup>4</sup>) and Isotropic Displacement Parameters (Å<sup>2</sup>×10<sup>3</sup>) for C<sub>8</sub>H<sub>6</sub>IN<sub>3</sub>O<sub>4</sub>.**

| Atom | x       | y    | z       | U(eq) |
|------|---------|------|---------|-------|
| H2   | 2632.14 | 7500 | 3078.73 | 60    |
| H3   | -226.25 | 7500 | 4307.9  | 67    |
| H2A  | 5581.86 | 7500 | 5106.53 | 63    |
| H3A  | 4545.12 | 7500 | 3793.3  | 61    |
| H5   | 724.83  | 7500 | 3056.85 | 66    |
| H8   | 2582.87 | 7500 | 6485.64 | 66    |

**Table S8. Static polarizability of different units.**

| Units                                                          | Static polarizability |       |        |      |      |       |
|----------------------------------------------------------------|-----------------------|-------|--------|------|------|-------|
|                                                                | xx                    | xy    | yy     | xz   | yz   | zz    |
| [C <sub>8</sub> H <sub>6</sub> IN <sub>2</sub> O] <sup>+</sup> | 189.67                | 28.82 | 126.75 | 0.00 | 0.00 | 31.58 |
| [NO <sub>3</sub> ] <sup>-</sup> ,                              | 21.04                 | 0.00  | 21.05  | 0.00 | 0.00 | 4.34  |

## References

- (1) *CrysAlisPro*, Ver. 1.171.36.28; Agilent Technologies: Santa Clara, CA, **2013**.
- (2) O. V. Dolomanov, L. J. Bourhis, R. J. Gildea, J. A. K. Howard, H. Puschmann, OLEX2: a complete structure solution, refinement and analysis program. *Journal of Applied Crystallography* **2009**, *42*, 339.
- (3) L. J. Bourhis, O. V. Dolomanov, R. J. Gildea, J. A. K. Howard, H. Puschmann, The anatomy of a comprehensive constrained, restrained refinement program for the modern computing environment-Olex2 dissected. *Acta Crystallographica a-Foundation and Advances* **2015**, *71*, 59.
- (4) G. M. Sheldrick, SHELXT-integrated space-group and crystal-structure determination. *Acta Crystallographica a-Foundation and Advances* **2015**, *71*, 3.
- (5) S. J. Clark, M. D. Segall, C. J. Pickard, P. J. Hasnip, M. J. Probert, K. Refson, M. C. Payne, First principles methods using CASTEP. *Zeitschrift Fur Kristallographie* **2005**, *220*, 567.
- (6) M. C. Payne, M. P. Teter, D. C. Allan, T. A. Arias, J. D. Joannopoulos, Iterative minimization techniques for *ab initio* total-energy calculations: molecular dynamics and conjugate gradients. *Reviews of Modern Physics* **1992**, *64*, 1045.
- (7) D. M. Ceperley, B. J. Alder, Ground-state of the electron-gas by a stochastic method. *Physical Review Letters* **1980**, *45*, 566.
- (8) J. P. Perdew, A. Zunger, Self-interaction correction to density-functional approximations for many-electron systems. *Physical Review B* **1981**, *23*, 5048.
- (9) H. J. Monkhorst, J. D. Pack, Special points for brillouin-zone integrations. *Physical Review B* **1976**, *13*, 5188.
- (10) M. J. Frisch, Gaussian 09, Revision B.01, Gaussian, Inc., Wallingford, USA, 2009.
- (11) T. Lu, F. Chen, *J. Comput. Chem.* **2012**, *33*, 580-592.
